# Supplementary material for: From α-Bromomethylbutenolide to Fused Tri(Tetra) Cyclic Dihydrofurandiones through Barbier Reaction–Heck Arylation Sequence
Source: MDPI journal article supplement (doi:10.3390/molecules22122171), 2017-12-08

## Supporting Information

### From $\alpha$ -bromomethylbutenolide to fused tri(four)cyclidihydro-furandiones through Barbier reaction-Heck arylation-oxidation sequence

Arbia Talbi,<sup>[a,b]</sup> Anne Gaucher,<sup>[b]</sup> Flavien Bourdreux,<sup>[b]</sup> Jérôme Marrot,<sup>[b]</sup> Mohamed Lotfi Efrit,<sup>[a]</sup> Hédi M'Rabet,<sup>\*,[a]</sup> and Damien Prim<sup>\*,[b]</sup>

<sup>a</sup>Université de Tunis El Manar, Faculté des Sciences de Tunis, Laboratoire de Synthèse Organique Sélective et Hétérocyclique-Evaluation de l'Activité Biologique, 2092 Tunis, Tunisie

<sup>b</sup>Université de Versailles Saint Quentin-en-Yvelines, Institut Lavoisier de Versailles-UMR CNRS 8180, 45 avenue des Etats-Unis, 78035 Versailles, France

Corresponding author. Fax.: +33(0)1 39 25 44 52; [damien.prim@uvsq.fr](mailto:damien.prim@uvsq.fr)

#### List of the Contents

1. General information
2. Representative procedure for allylation of aldehydes with 3-bromomethyl-5H-furan-2-one
3. Characterization data for the lactone 3
4. Synthetic procedure for Pd-catalyzed Heck reaction of bromoderivative 3
5. Characterization data for compounds 4 and 5
6. Synthetic procedure for Pd-catalyzed Heck reaction of bromoderivatives 12 -14
7. Characterization data for compounds 15 and 16
8. References
9. <sup>1</sup>H and <sup>13</sup>C-NMR Spectra
10. Noesy experiment results
11. control experiment : olefin migration
11. X-ray crystal structure for lactone 3 and 16

#### 1. General information

All reagents and solvents were obtained from commercial sources and used without further purification. Reactions were routinely carried out under nitrogen and argon atmosphere with magnetic stirring. <sup>1</sup>H and <sup>13</sup>C-NMR spectra were recorded on a Bruker AMX 300 spectrometer working at 300 MHz, 75 MHz respectively for <sup>1</sup>H and <sup>13</sup>C with chloroform-d as solvent. Chemical shifts were reported in  $\delta$ , parts per million (ppm), relative to chloroform ( $\delta$  = 7.28 ppm) as international standards unless otherwise stated for proton nuclear magnetic resonance (<sup>1</sup>H-NMR). Chemical shifts for carbon nuclear magnetic resonance (<sup>13</sup>C-NMR) were reported in  $\delta$ , parts per million (ppm), relative to the center line of the chloroform triplet ( $\delta$  = 77.07 ppm). Coupling constants, *J*, were reported in Hertz (Hz) and refer to apparent peak multiplicities and not true coupling constants. The abbreviations s, d, dd, t, q, br and m stand for resonance multiplicities singlet, doublet, doublet of doublet,

triplet, quartet, broad and multiplet, respectively. Allylation diastereoselectivity was determined by  $^1\text{H}$ -NMR integrations of the methylene signals in the crude products. High Resolution Mass spectroscopy data were recorded on an Autospec Ultima (Waters/Micromass) device with a resolution of 5000 RP at 5%. Thin-layer chromatography (TLC) was carried out on aluminium sheets precoated with silica gel plates (Fluka Kiesel gel 60 F254, Merck) and visualized by a 254 nm UV lamp and potassium permanganate. Melting points (Mp) were determined on a System Kofler type WME apparatus.

## 2. Representative procedure for allylation of aldehydes with 3-bromomethyl-5H-furan-2-one

To a reaction vessel were added sequentially 3-bromomethyl-5H-furan-2-one **1** (400 mg, 2.26 mmol), aldehyde **2** (1.53 mmol, 0.68 equiv.), THF (2 mL) saturated aqueous  $\text{NH}_4\text{Cl}$  (1 mL) and activated zinc powder [30] (2.64 mmol, 1.17 equiv.). The mixture was stirred vigorously at ambient temperature. After 16h, the reaction was filtered through diatomite, extracted with diethyl ether (2 x 20 mL for each extraction), washed with brine (20 mL) and dried over anhydrous  $\text{MgSO}_4$ . Evaporation *in vacuo* followed by flash column chromatography on silica gel (petroleum ether/ethyl acetate, 7:3) afforded homoallylic alcohols **3**, **12**, **13** and **14**

## 3. Characterization data for the lactone **3**, **12**, **13**, **14**

**4-((2-Bromophenyl)(hydroxyl)methyl)-3-methylenedihydrofuran-2(3H)-one **3****. White solid; Mp: 111-115 °C; Yield: (281, 65%); dr: (85:5);  $^1\text{H}$ -NMR (300 MHz,  $\text{CDCl}_3$ ):  $\delta$  = 7.55 (d,  $J$  = 7.5 Hz, 1H), 7.46 (d,  $J$  = 7.8 Hz, 1H), 7.34 (t,  $J$  = 7.5 Hz, 1H), 7.18 (t,  $J$  = 7.5 Hz, 1H), 6.23 (d,  $J$  = 2.1 Hz, 1H), 5.22 (d,  $J$  = 2.4 Hz, 1H), 5.21 (d,  $J$  = 3.90 Hz, 1H), 4.34-4.32 (m, 2H), 3.52-3.48 (m, 1H), 2.98 (s (*br.*), 1H) ppm; Discernable data for minor diastereoisomer:  $\delta$  = 6.28 (d,  $J$  = 2.4 Hz, 1H), 5.48 (d,  $J$  = 2.1 Hz, 1H), 5.25 (d,  $J$  = 4.8 Hz, 1H), 4.51 (dd,  $J$  = 9.3 Hz,  $J$  = 4.20 Hz, 1H), 4.19-4.13 (m, 1H) ppm;  $^{13}\text{C}$ -NMR (75 MHz,  $\text{CDCl}_3$ ):  $\delta$  = 171.0 (C=O), 139.5 (*aromatic* =C), 133.7 ( $\text{H}_2\text{C}=\text{C}$ ), 132.9 (*aromatic* =CH), 129.7 (*aromatic* =CH), 128.8 (*aromatic* =CH), 127.6 (*aromatic* =CH), 125.4 (*aromatic* =C-Br), 122.0 ( $\text{H}_2\text{C}=\text{C}$ ), 74.0 (CH-OH), 68.5 ( $\text{OCH}_2$ ), 43.6 (CH) ppm; HRMS (ESI) calcd. for  $\text{C}_{12}\text{H}_{12}\text{O}_3\text{Br}$   $[\text{M}+\text{H}]^+$  282.9970, found 282.9979.

**4-((1-Bromonaphthalen-2-yl)(hydroxyl)methyl)-3-methylenedihydrofuran-2(3H)-one **12****. Light yellow solid; Mp: 140-142 °C; Yield: (305 mg, 60%); dr: (87:13);  $^1\text{H}$ -NMR (300 MHz,  $\text{CDCl}_3$ ):  $\delta$  = 8.35 (d,  $J$  = 8.4 Hz, 1H), 7.86 (d,  $J$  = 8.4 Hz, 2H), 7.63-7.59 (m, 3H), 6.34 (d,  $J$  = 2.1 Hz, 1H), 5.56 (d,  $J$  = 6.6 Hz, 1H), 5.48 (d,  $J$  = 1.5 Hz, 1H), 4.31-4.29 (m, 2H), 3.63-3.56 (m, 1H), 2.71 (s (*br.*), 1H) ppm; Discernable data for minor diastereoisomer:  $\delta$  = 6.28 (d,  $J$  = 2.4 Hz, 1H), 5.60 (d,  $J$  = 5.4 Hz, 1H), 5.38 (d,  $J$  = 2.4 Hz, 1H), 4.65 (dd,  $J$  = 9.6 Hz,  $J$  = 4.2 Hz, 1H), 4.31-4.25 (m, 1H) ppm;  $^{13}\text{C}$ -NMR (75 MHz,  $\text{CDCl}_3$ ):  $\delta$  = 170.9 (C=O), 137.6 ( $\text{H}_2\text{C}=\text{C}$ ), 134.4 (*aromatic* =C), 134.3 (*aromatic* =C), 132.0 (*aromatic* =C), 128.2 (*aromatic* =CH), 128.1 (*aromatic* =CH), 127.9 (*aromatic* =CH), 127.5 (*aromatic* =CH), 127.2 (*aromatic* =CH), 125.7 (*aromatic* =CH), 125.1 (*aromatic* =C-Br), 122.5 ( $\text{H}_2\text{C}=\text{C}$ ), 74.8 (CH-OH), 68.2 ( $\text{OCH}_2$ ), 44.2 (CH) ppm; HRMS (ESI) calcd. for  $\text{C}_{16}\text{H}_{14}\text{O}_3\text{Br}$   $[\text{M}+\text{H}]^+$  333.0126, found 333.0138.

**4-((1-Chloro-3,4-dihydronaphthalen-2-yl)(hydroxyl)methyl)-3-methylenedihydrofuran-2(3H)-one **13****. Colorless oil; Yield: (357 mg, 80%); dr: (89:11);  $^1\text{H}$ -NMR (300 MHz,  $\text{CDCl}_3$ ):  $\delta$  = 7.67-7.64 (m, 1H), 7.30-7.27 (m, 2H), 7.26-7.19 (m, 1H), 6.41 (d,  $J$  = 2.1 Hz, 1H), 6.10 (d,  $J$  = 1.5 Hz, 1H), 5.09 (d,  $J$  = 9.6 Hz, 1H), 4.25 (t,  $J$  = 9.6 Hz, 1H), 4.10 (dd,  $J$  = 9.6 Hz,  $J$  = 4.5 Hz, 1H), 3.35-3.32 (m, 1H), 2.89-2.81 (m, 2H), 2.72-2.62 (m, 1H), 2.44 (s (*br.*), 1H), 2.39-2.28 (m, 1H) ppm; Discernable data for minor diastereoisomer:  $\delta$  = 6.30 (d,  $J$  = 2.4 Hz, 1H), 5.57 (d,  $J$  = 2.1 Hz, 1H), 4.57 (dd,  $J$  = 9.3 Hz,  $J$  = 4.20 Hz, 1H), 4.47 (t,  $J$  = 9.3 Hz, 1H) ppm;  $^{13}\text{C}$ -NMR (75 MHz,  $\text{CDCl}_3$ ):  $\delta$  = 170.7 (C=O), 136.3 (*aromatic* =C), 135.4 ( $\text{H}_2\text{C}=\text{C}$ ), 134.7 (*aromatic* =C), 132.2 (Cl-C=C), 128.7 (*aromatic* =CH), 128.5 (*aromatic* =CH), 127.2 (*aromatic* =CH), 126.9 (=C-Cl), 125.6 (*aromatic* =CH), 125.1 ( $\text{H}_2\text{C}=\text{C}$ ), 72.1 (CH-OH), 67.0 ( $\text{OCH}_2$ ), 42.2 (CH), 27.7 ( $\text{CH}_2$ ), 23.4 ( $\text{CH}_2$ ) ppm; HRMS (ESI) calcd. for  $\text{C}_{16}\text{H}_{16}\text{O}_3\text{Cl}$   $[\text{M}+\text{H}]^+$  291.0782, found 291.0776.

**4-((1-Bromo-3,4-dihydronaphthalen-2-yl)(hydroxyl)methyl)-3-methylenedihydrofuran-2(3H)-one **14****. Grayish solid; Mp: 135-137 °C; Yield: (457 mg, 89%); dr: (94:6);  $^1\text{H}$ -NMR (300 MHz,  $\text{CDCl}_3$ ):  $\delta$  = 7.67-7.66 (m, 1H), 7.30-7.23 (m, 3H), 7.17-7.15 (m, 1H), 6.43 (d,  $J$  = 2.1 Hz, 1H), 6.10 (d,  $J$  = 1.5 Hz, 1H), 5.09 (d,  $J$  = 9.6 Hz, 1H), 4.26 (t,  $J$  = 9.3 Hz, 1H), 4.13 (dd,  $J$  = 9.6 Hz,  $J$  = 4.6 Hz, 1H), 3.37-3.34 (m, 1H), 2.92-2.81 (m, 2H), 2.72-2.62 (m, 1H), 2.37-2.26 (m, 1H) ppm;  $^{13}\text{C}$ -NMR (75 MHz,  $\text{CDCl}_3$ ):  $\delta$  = 170.6 (C=O), 137.9 ( $\text{H}_2\text{C}=\text{C}$ ), 136.4 (Br-C=C), 135.3 (*aromatic* =C), 133.1 (*aromatic* =C), 128.8 (*aromatic* =CH), 127.7 (*aromatic* =CH), 127.1 (*aromatic* =CH), 127.0 (*aromatic* =CH), 125.6 ( $\text{H}_2\text{C}=\text{C}$ ), 121.6 (=C-Br), 75.1 (CH-OH), 66.9 ( $\text{OCH}_2$ ), 42.2 (CH), 27.8 ( $\text{CH}_2$ ), 24.5 ( $\text{CH}_2$ ) ppm; HRMS (ESI) calcd. for  $\text{C}_{16}\text{H}_{16}\text{O}_3\text{Br}$   $[\text{M}+\text{H}]^+$  335.0277, found 335.0271.

## 4. General procedure for Pd-catalyzed Heck reaction of bromoderivative **3**

## Procedure A

A mixture of lactone **3** (100 mg, 0.35 mmol), PdCl<sub>2</sub>(PPh<sub>3</sub>)<sub>2</sub> (12.5 mg, 0.017 mmol), and K<sub>2</sub>CO<sub>3</sub> (98 mg, 0.71 mmol) in solvent (3mL) was purged under argon atmosphere and stirred at 95 °C for 16 h. After completion of the reaction (as monitored by TLC), the mixture was diluted with water (10 mL) and extracted with CH<sub>2</sub>Cl<sub>2</sub> (3 x 10 mL). The combined organic layers were dried over anhydrous MgSO<sub>4</sub>, concentrated under reduced pressure and purified by flash column chromatography on silica gel eluting with CH<sub>2</sub>Cl<sub>2</sub>/petroleum ether, (8:2) to give the expected product **4**.

**3-Methylene-3a,9b-dihydro-4H-furo[3,2-c]chromen-2(3H)-one 4.** Yellow oil; Yield: (29 mg, 40%); <sup>1</sup>H-NMR (300 MHz, CDCl<sub>3</sub>): δ = 7.60 (d, *J* = 7.8 Hz, 1H), 7.39-7.20 (m, 3H), 6.47 (d, *J* = 2.1 Hz, 1H), 5.81 (d, *J* = 1.8 Hz, 1H), 5.71 (d, *J* = 3.3 Hz, 1H), 4.10 (dd, *J* = 12.0 Hz, *J* = 6.0 Hz, 1H), 3.97 (dd, *J* = 9.0 Hz, *J* = 6.0 Hz, 1H), 3.18-3.11 (m, 1H) ppm; <sup>13</sup>C-NMR (75 MHz, CDCl<sub>3</sub>): δ = 170.0 (C=O), 138.8 (*aromatic* =C), 135.3 (H<sub>2</sub>C=C), 133.2 (*aromatic* =CH), 129.9 (*aromatic* =CH), 128.0 (*aromatic* =C), 126.8 (*aromatic* =CH), 124.7 (H<sub>2</sub>C=C), 121.1 (*aromatic* =CH), 79.4 (OCH), 64.0 (OCH<sub>2</sub>), 49.6 (=C-CH) ppm; HRMS (ESI) calcd. for C<sub>12</sub>H<sub>11</sub>O<sub>3</sub> [M+H]<sup>+</sup> 203.0708, found 203.0706.

**(10a)-Methyl-7a,10a-dihydro-7H-benzo[6,7]indeno[1,2-c]furan-7,10(8H)-dione 15.** Yellow solid; Mp: 206-207 °C; Yield: (46 mg, 60%); <sup>1</sup>H-NMR (300 MHz, CDCl<sub>3</sub>): δ = 8.95 (d, *J* = 9.9 Hz, 1H), 7.99-7.94 (m, 2H), 7.78-7.72 (m, 3H), 4.77 (t, *J* = 9.3 Hz, 1H), 4.45 (dd, *J* = 9.9 Hz, *J* = 5.10 Hz, 1H), 3.47 (dd, *J* = 10.5 Hz, *J* = 5.1 Hz, 1H), 2.08 (s, 3H) ppm; <sup>13</sup>C-NMR (75 MHz, CDCl<sub>3</sub>): δ = 202.9 (C=O), 176.5 (CO<sub>2</sub>), 153.9 (*aromatic* =C), 138.2 (*aromatic* =C), 133.0 (*aromatic* =C), 131.4 (*aromatic* =C), 129.7 (*aromatic* =CH), 129.6 (*aromatic* =CH), 129.3 (*aromatic* =CH), 127.8 (*aromatic* =CH), 127.6 (*aromatic* =CH), 119.2 (*aromatic* =CH), 66.4 (OCH<sub>2</sub>), 56.3 (CH), 52.0 (CCH<sub>3</sub>), 23.5 (CH<sub>3</sub>) ppm; HRMS (ESI) calcd. for C<sub>16</sub>H<sub>11</sub>O<sub>3</sub> [M-H]<sup>-</sup> 251.0708, found 251.0710.

**(10a)-Methyl-6,7a,8,10a-tetrahydro-7H-benzo[6,7]indeno[1,2-c]furan-7,10(5H)-dione 16.** Yellow solid; Mp: 122-124 °C; Yield: (46 mg, 60%); <sup>1</sup>H-NMR (300 MHz, CDCl<sub>3</sub>): δ = 8.42 (d, *J* = 9.3 Hz, 1H), 7.40-7.30 (m, 3H), 4.64 (t, *J* = 9.9 Hz, 1H), 4.50 (dd, *J* = 9.9 Hz, *J* = 3.9 Hz, 1H), 3.19 (dd, *J* = 9.6 Hz, *J* = 3.6 Hz, 1H), 2.97-2.91 (m, 2H), 2.73-2.64 (m, 1H), 2.49-2.37 (m, 1H), 1.87 (s, 3H) ppm; <sup>13</sup>C-NMR (75 MHz, CDCl<sub>3</sub>): δ = 203.5 (C=O), 176.3 (CO<sub>2</sub>), 165.2 (=C-CO), 139.9 (*aromatic* =C), 138.0 (*aromatic* =C), 131.3 (=C), 129.3 (*aromatic* =CH), 128.7 (*aromatic* =CH), 128.5 (*aromatic* =CH), 127.1 (*aromatic* =CH), 66.4 (OCH<sub>2</sub>), 55.4 (CCH<sub>3</sub>), 52.0 (CH), 28.1 (CH<sub>2</sub>), 22.0 (CH<sub>2</sub>), 18.4 (CH<sub>3</sub>) ppm; HRMS (ESI) calcd. for C<sub>16</sub>H<sub>15</sub>O<sub>3</sub> [M+H]<sup>+</sup> 255.1011, found 255.1016.

## Procedure B

A mixture of lactone **3** (100 mg, 0.35 mmol), PdCl<sub>2</sub>(PPh<sub>3</sub>)<sub>2</sub> (12.5 mg, 0.017 mmol) and KOAc (69.6 mg, 0.71 mmol) in CH<sub>3</sub>CN (3mL). The mixture was purged under argon atmosphere and stirred at 95 °C for 16 h. After completion of the reaction (as monitored by TLC), the mixture was diluted with water (10 mL) and extracted with CH<sub>2</sub>Cl<sub>2</sub> (3 x 10 mL). The combined organic layers were dried over anhydrous MgSO<sub>4</sub> and concentrated under reduced pressure and purified by flash column chromatography on silica gel eluting with CH<sub>2</sub>Cl<sub>2</sub>/petroleum ether, (8:2) to give the expected product **5**.

**(3a)-Methyl-3a,8a-dihydro-1H-indeno[1,2-c]furan-3,8-dione 5.** Yellow solid; Mp: 122-124 °C; Yield: (29 mg, 40%). <sup>1</sup>H-NMR (300 MHz, CDCl<sub>3</sub>): δ = 7.83-7.74 (m, 3H), 7.55 (d, *J* = 7.2 Hz, 1H), 4.66 (t, *J* = 9.9 Hz, 1H), 4.51 (dd, *J* = 9.9 Hz, *J* = 7.2 Hz, 1H), 3.30 (dd, *J* = 9.0 Hz, *J* = 3.3 Hz, 1H), 1.83 (s, 3H) ppm; <sup>13</sup>C-NMR (75 MHz, CDCl<sub>3</sub>): δ = 203.4 (C=O), 177.2 (CO<sub>2</sub>), 154.2 (*aromatic* =C), 136.5 (*aromatic* =C), 134.4 (*aromatic* =CH), 129.6 (*aromatic* =CH), 125.1 (*aromatic* =CH), 124.1 (*aromatic* =CH), 66.4 (OCH<sub>2</sub>), 54.7 (CCH<sub>3</sub>), 29.6 (CH), 22.2 (CH<sub>3</sub>) ppm; HRMS (ESI) calcd. for C<sub>12</sub>H<sub>11</sub>O<sub>3</sub> [M+H]<sup>+</sup> 203.0708, found 203.0706.

## 9. <sup>1</sup>H and <sup>13</sup>C-NMR Spectra

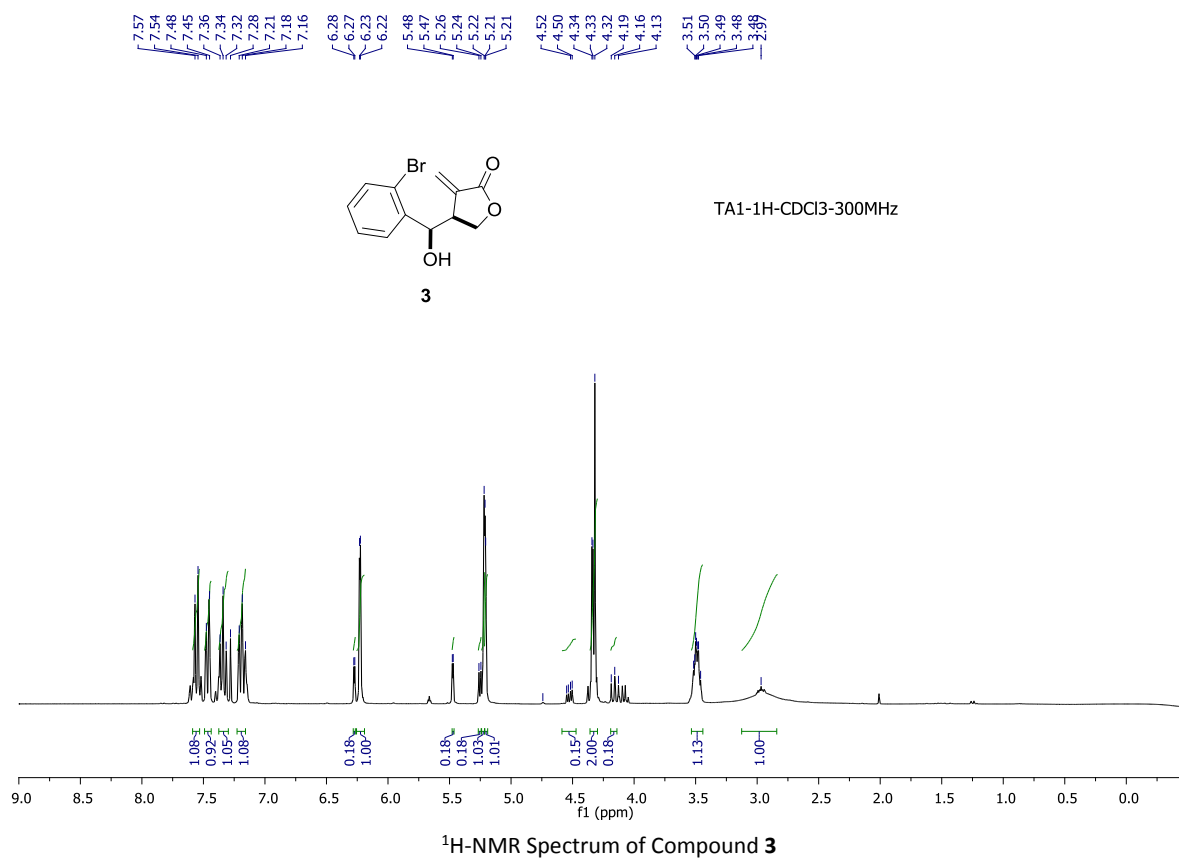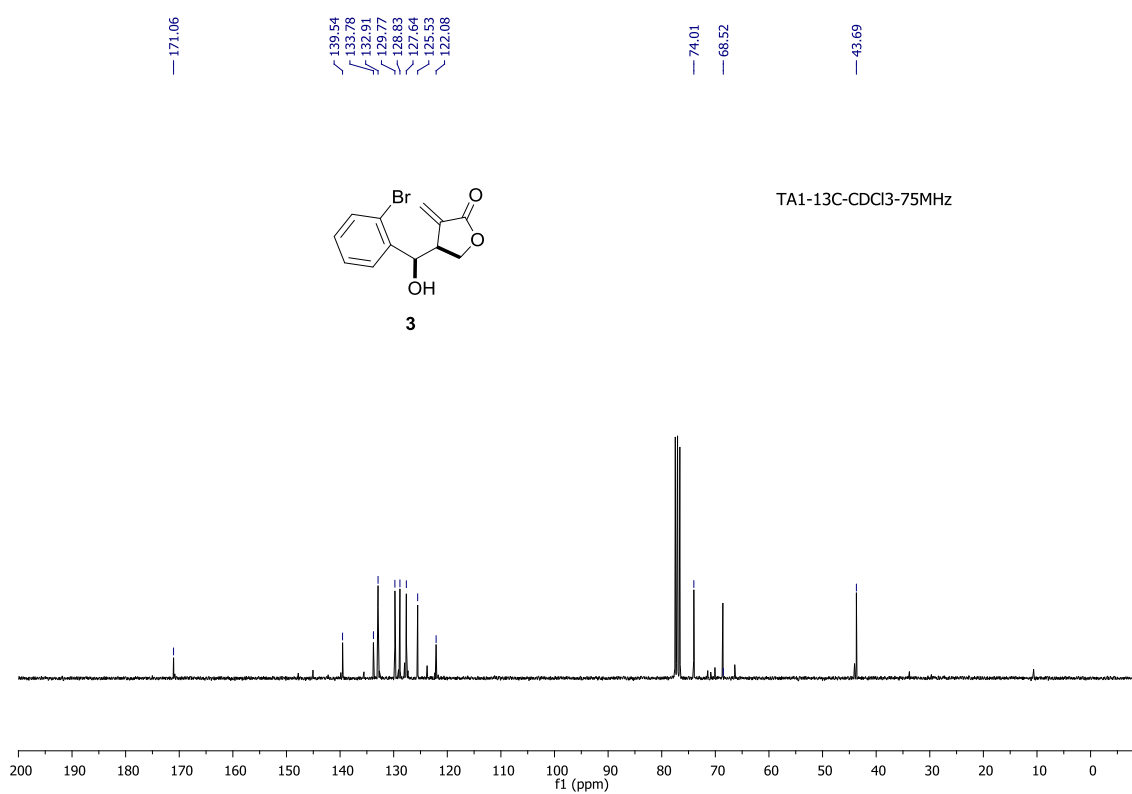

<sup>13</sup>C-NMR Spectrum of Compound **3**

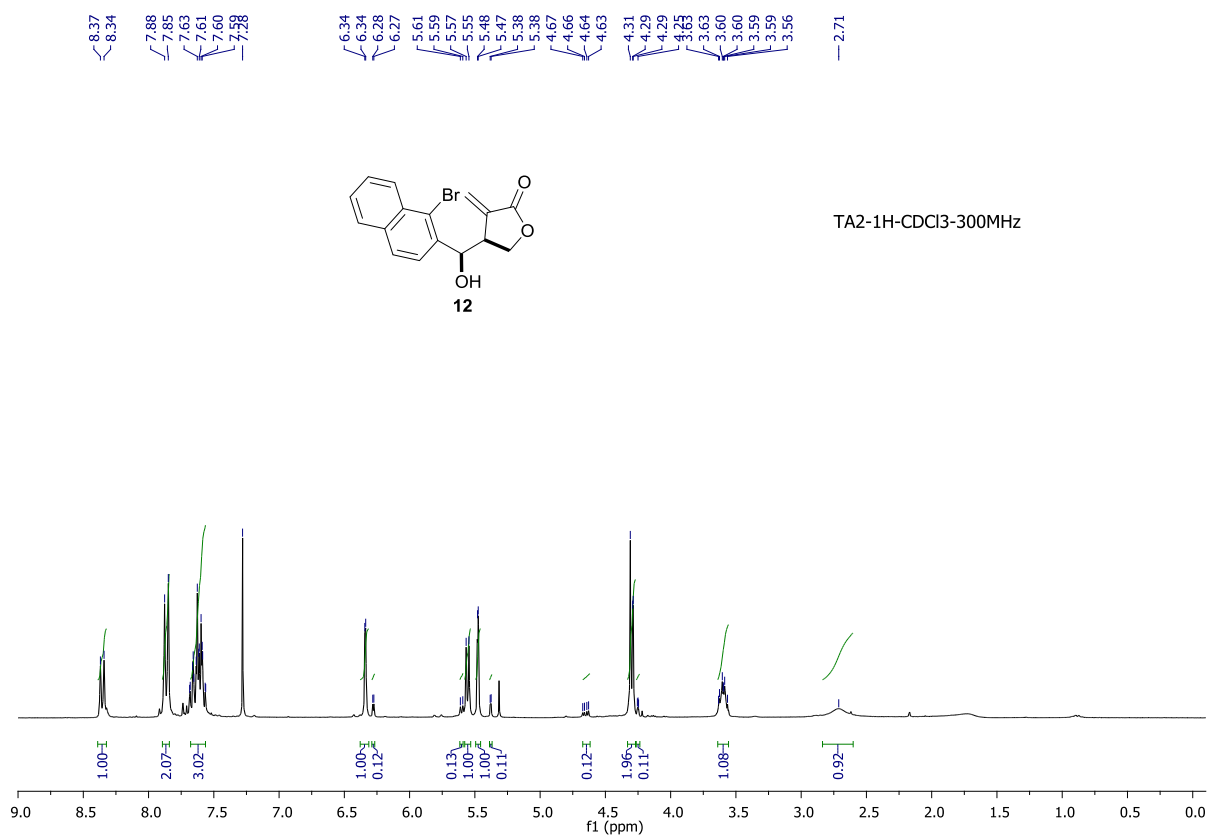

$^1\text{H}$ -NMR Spectrum of Compound **12**

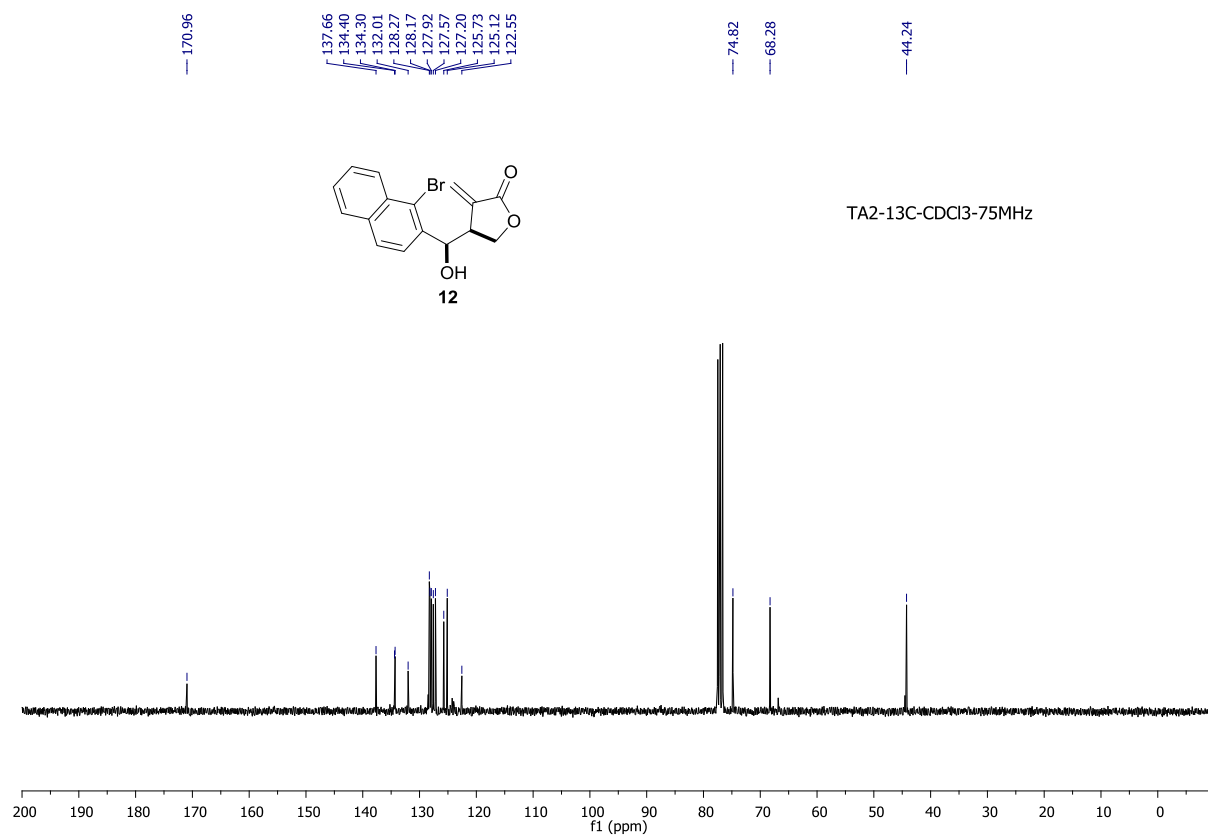

$^{13}\text{C}$ -NMR Spectrum of Compound **12**

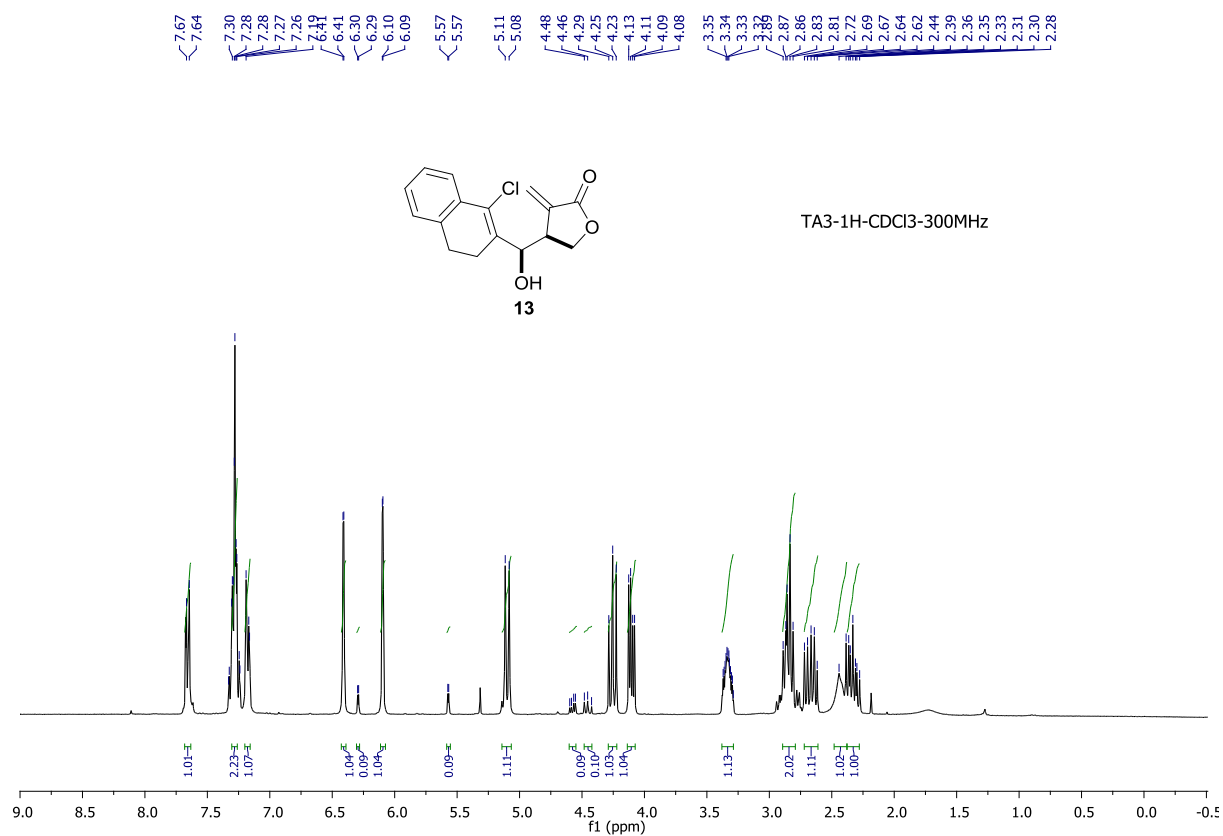

<sup>1</sup>H-NMR Spectrum of Compound **13**

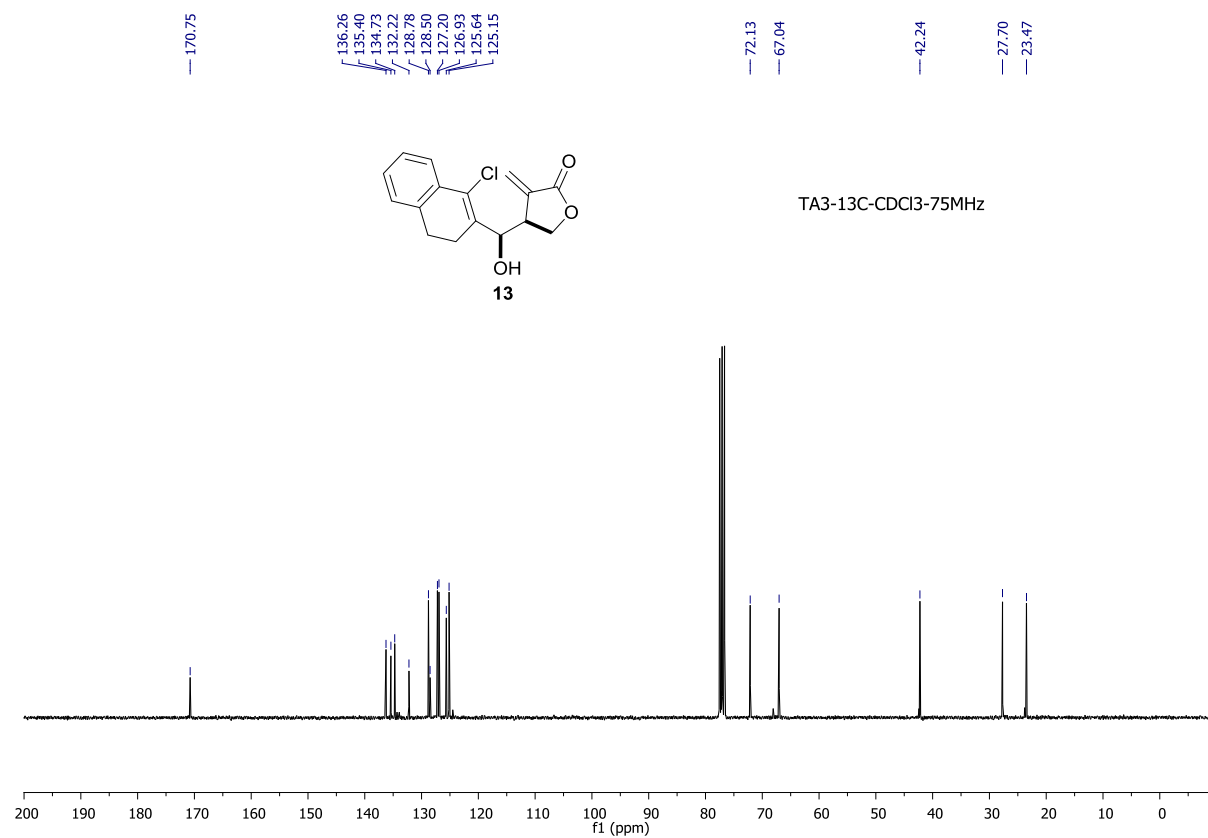

<sup>13</sup>C-NMR Spectrum of Compound **13**

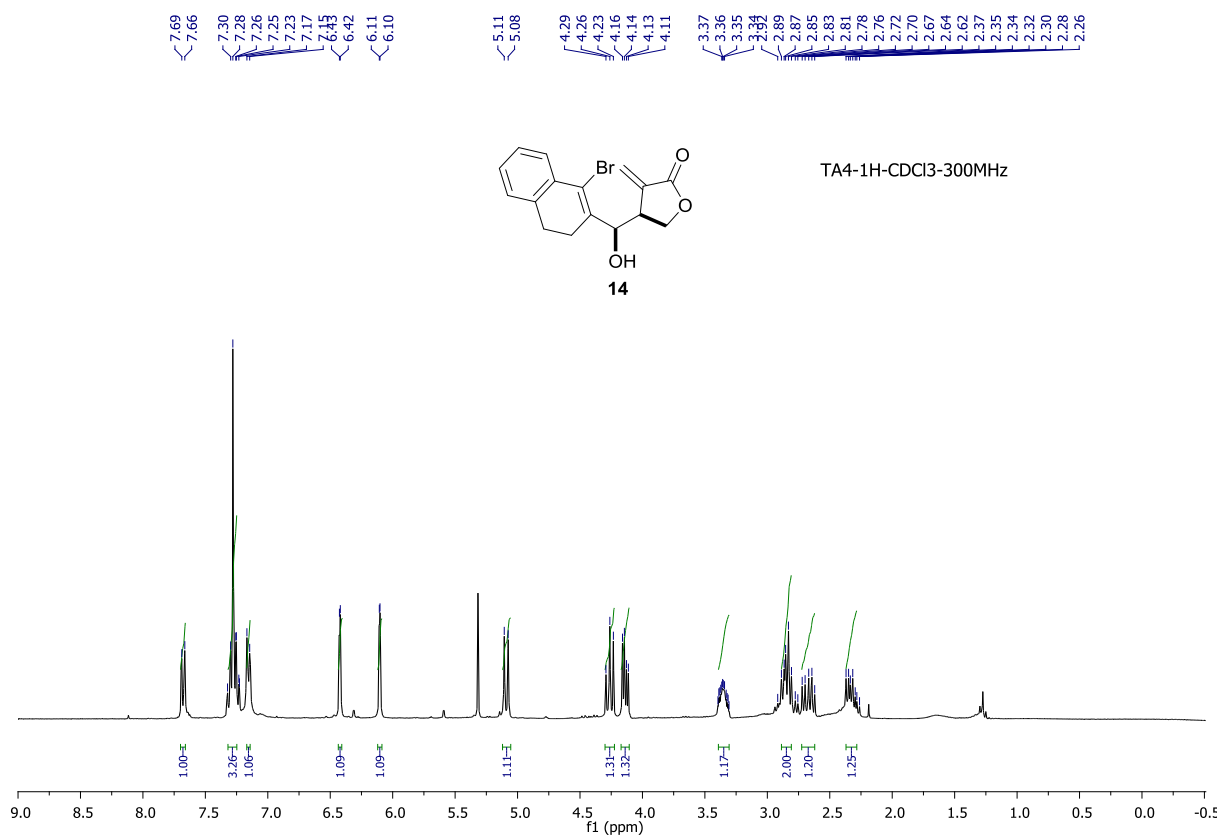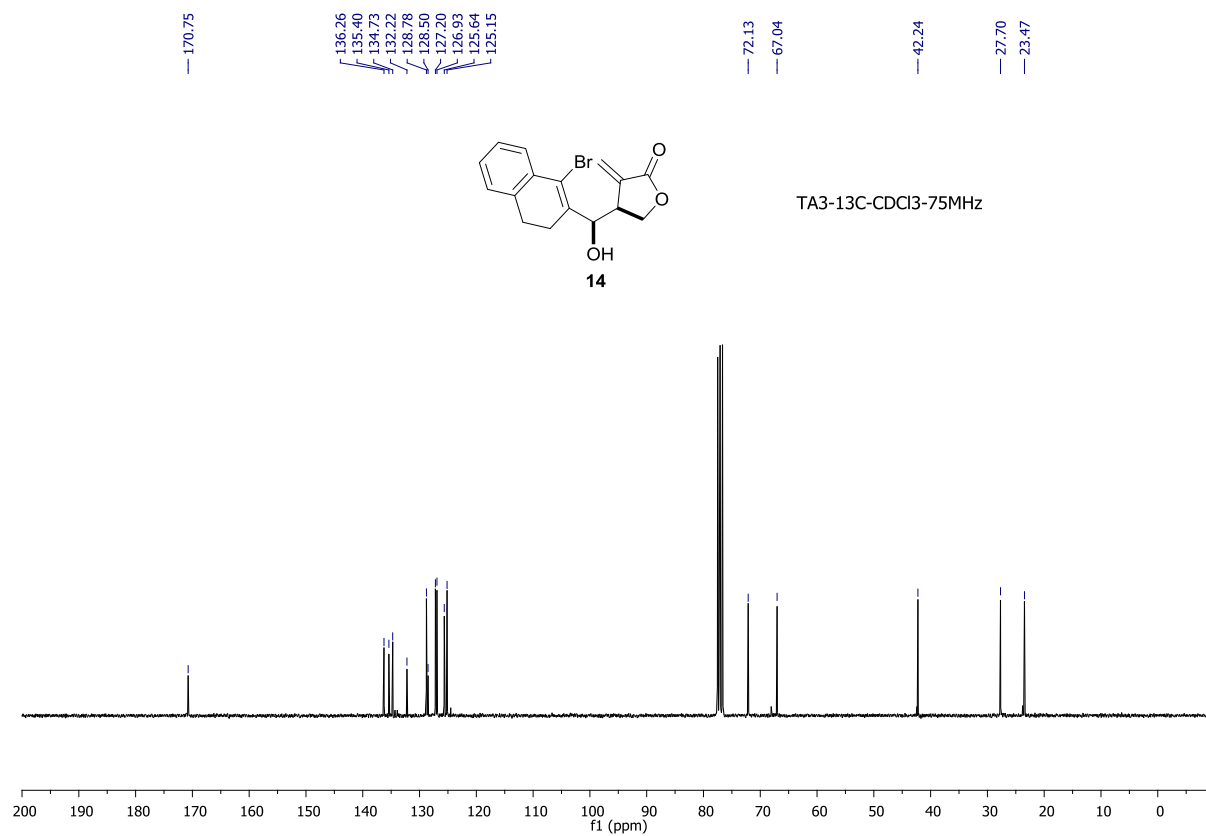

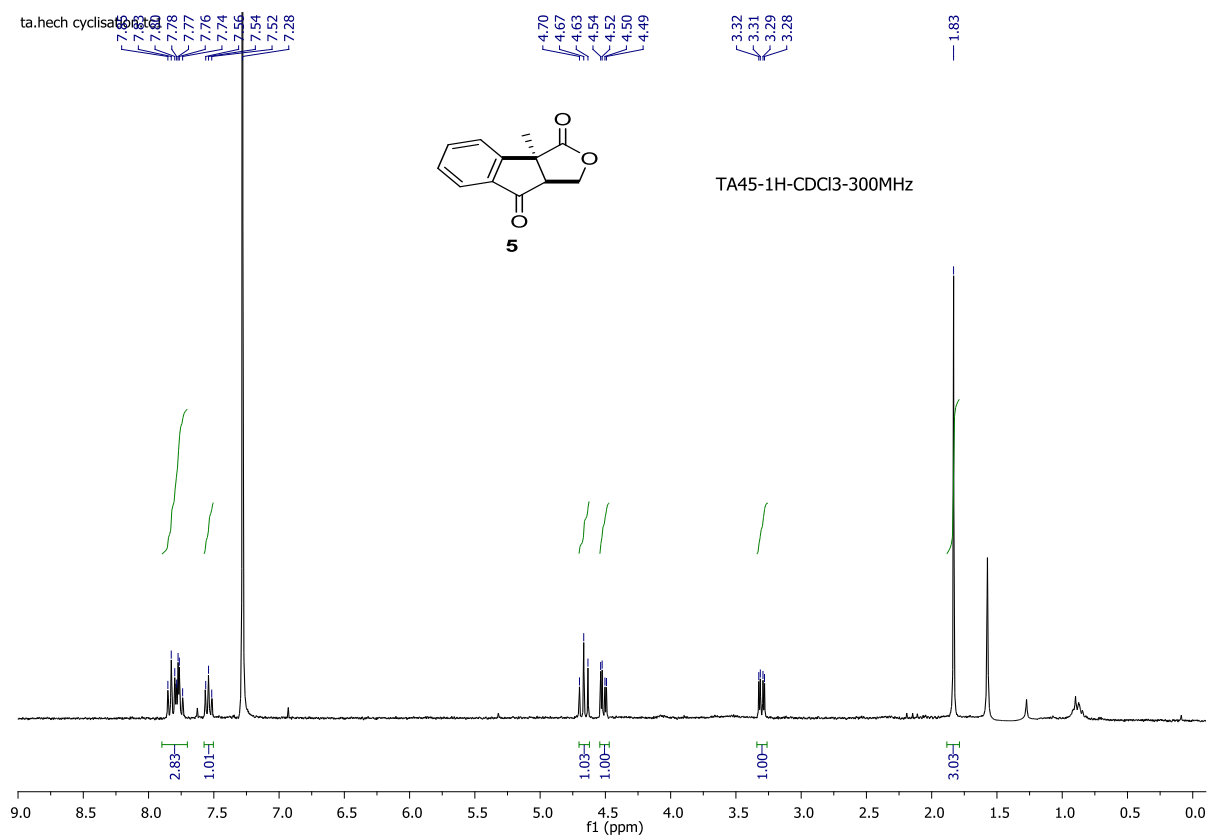

<sup>1</sup>H-NMR Spectrum of Compound 5

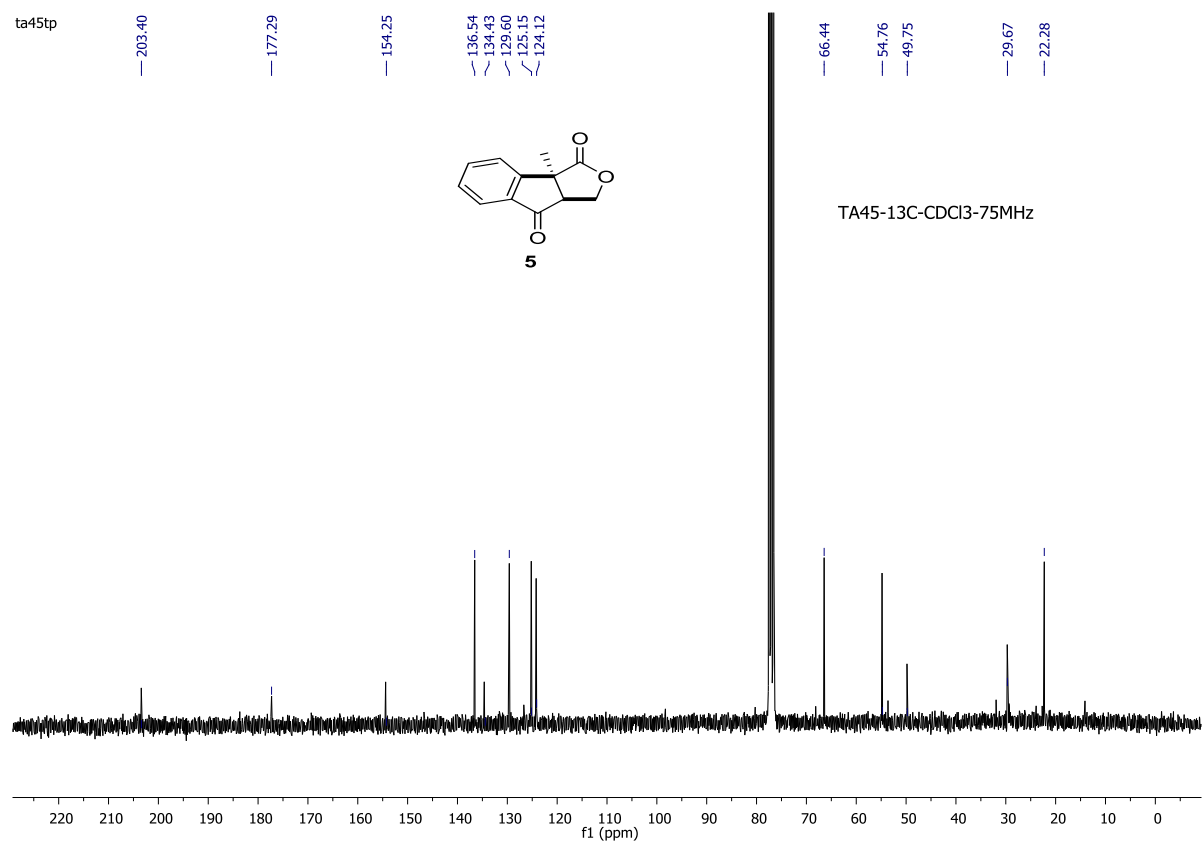

<sup>13</sup>C-NMR Spectrum of Compound 5



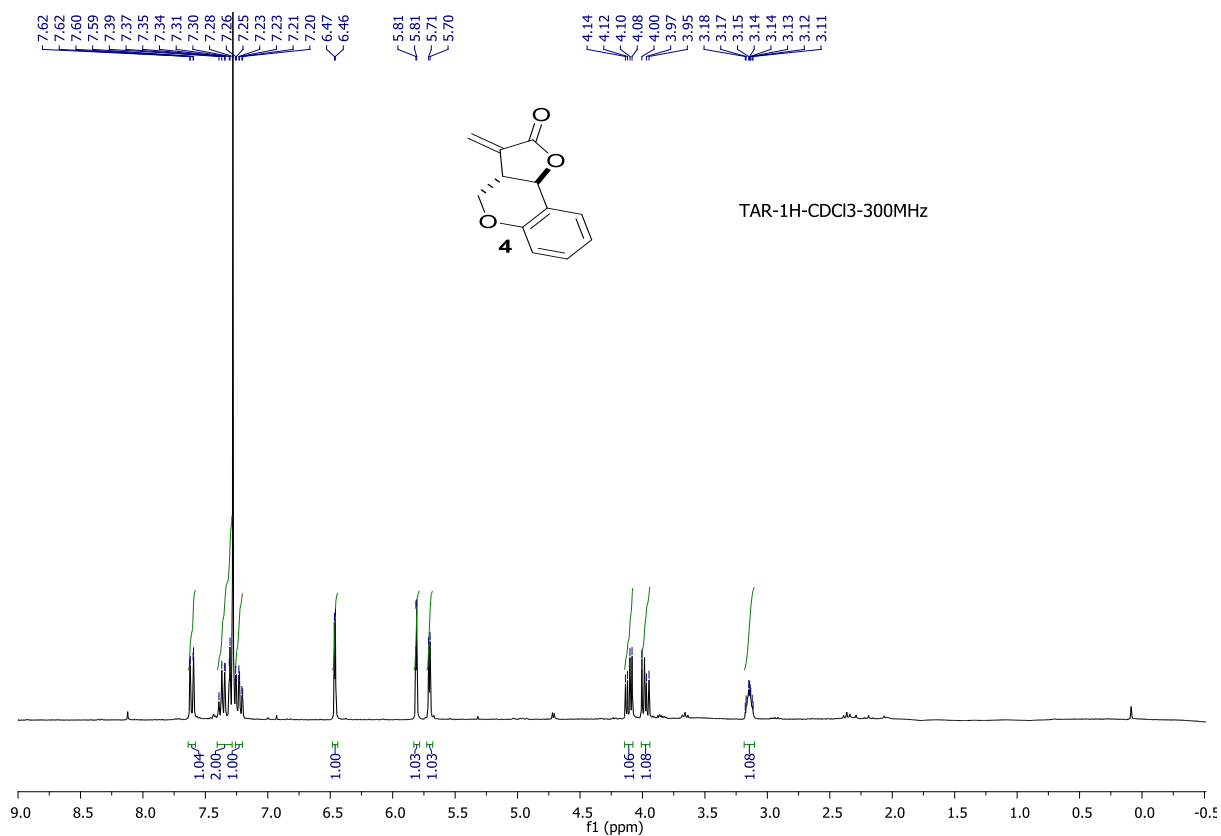

<sup>1</sup>H-NMR Spectrum of Compound **4**

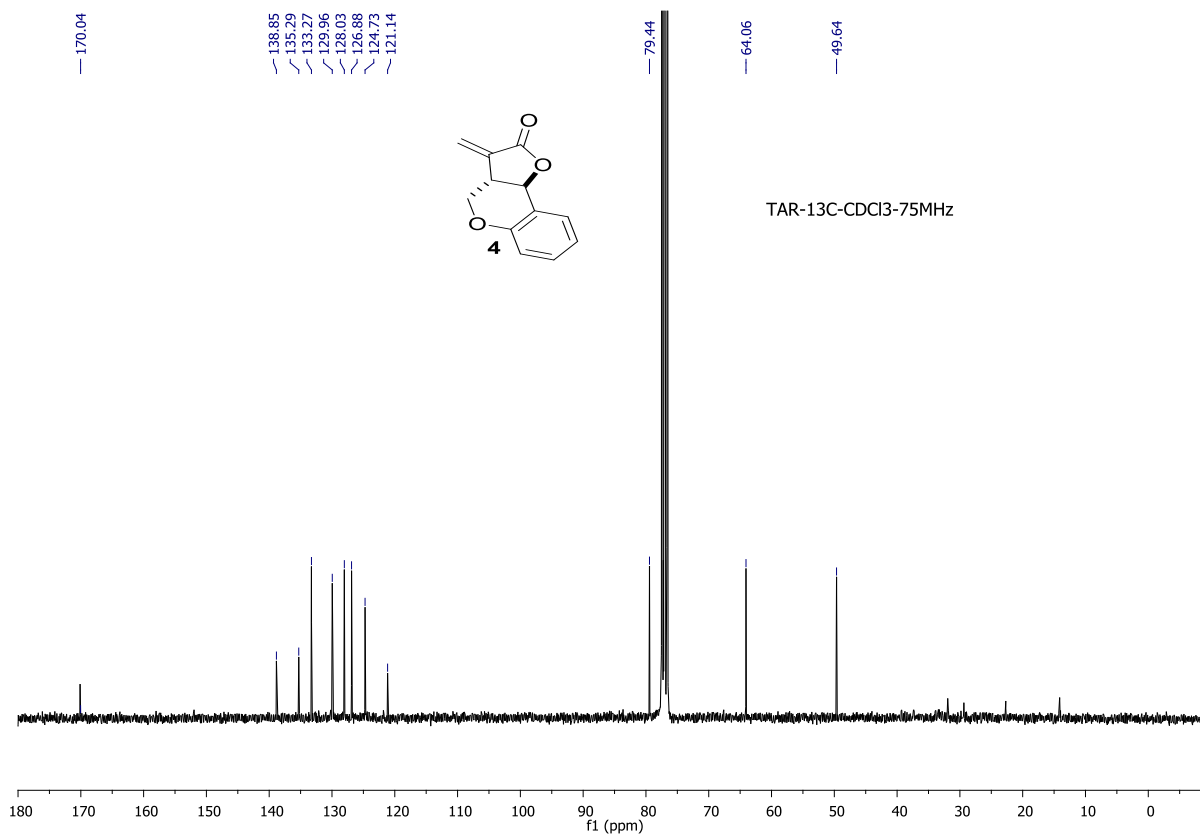

<sup>13</sup>C-NMR Spectrum of Compound **4**

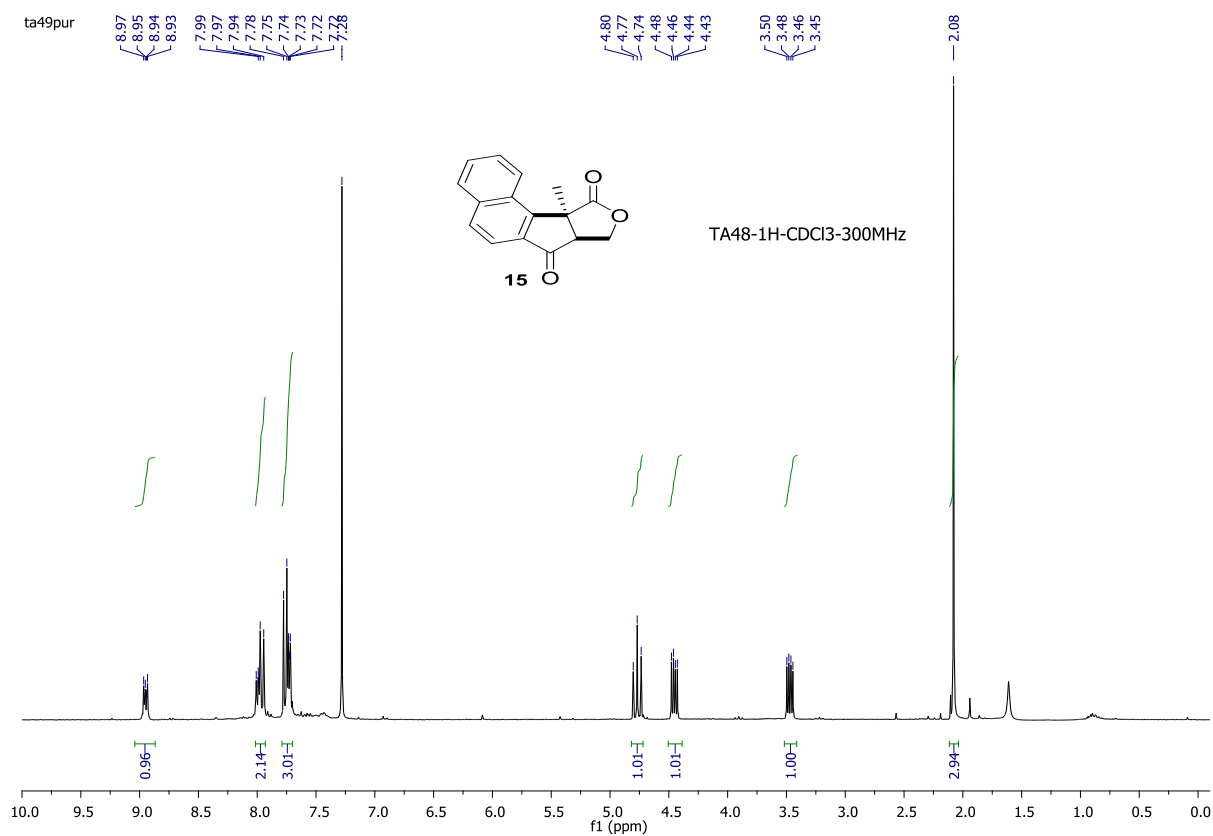

<sup>1</sup>H-NMR Spectrum of Compound **15**

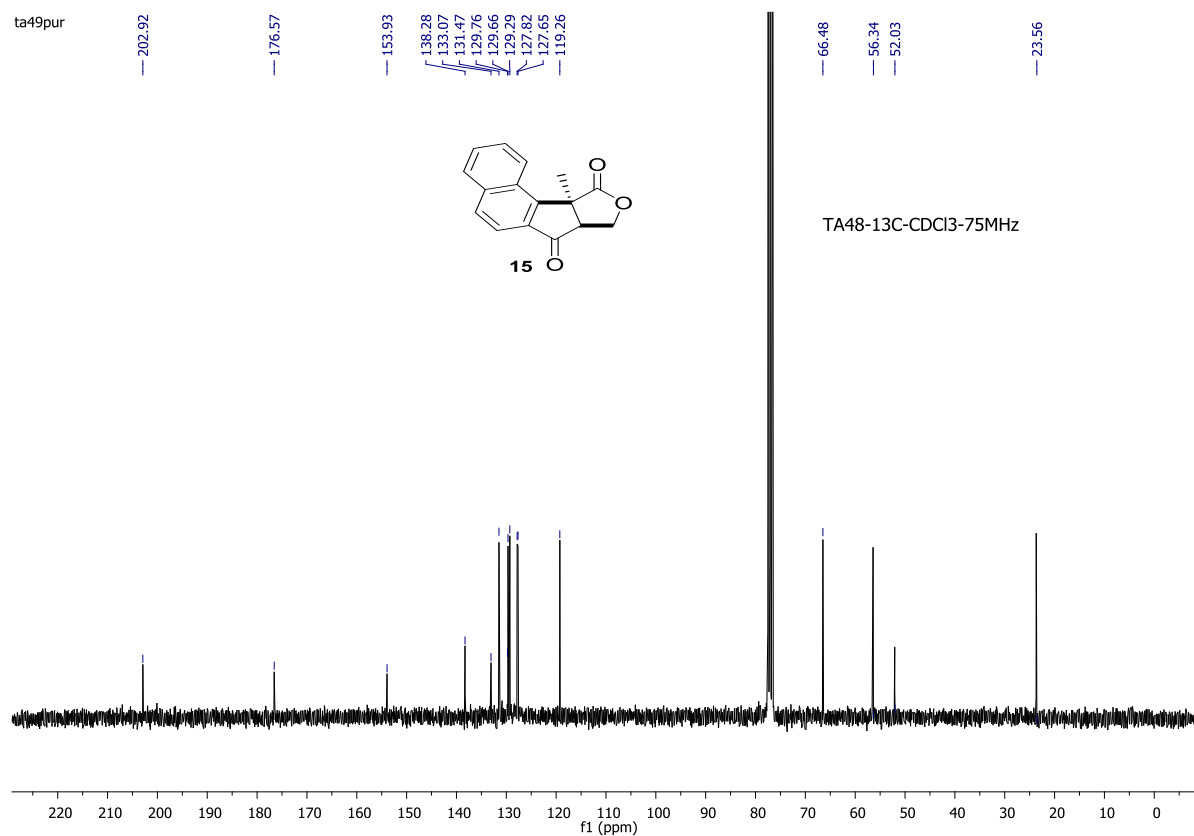

<sup>13</sup>C-NMR Spectrum of Compound **15**

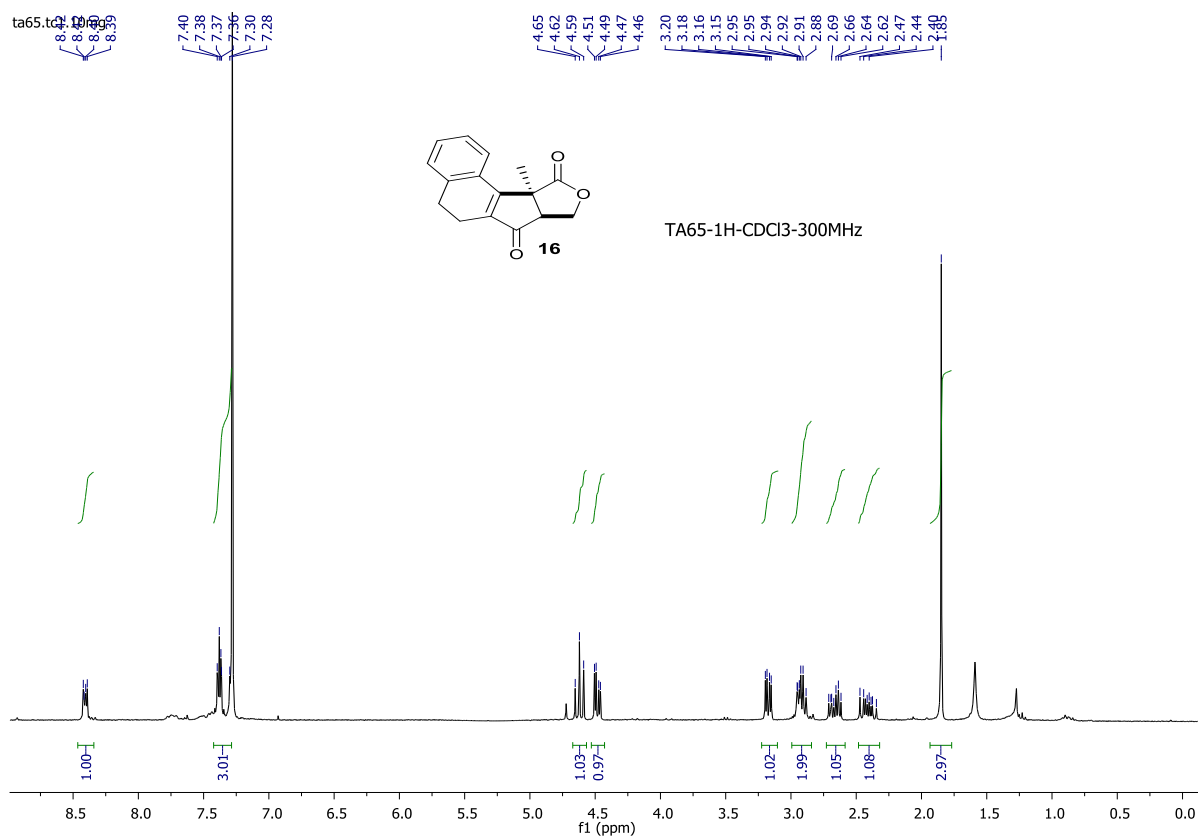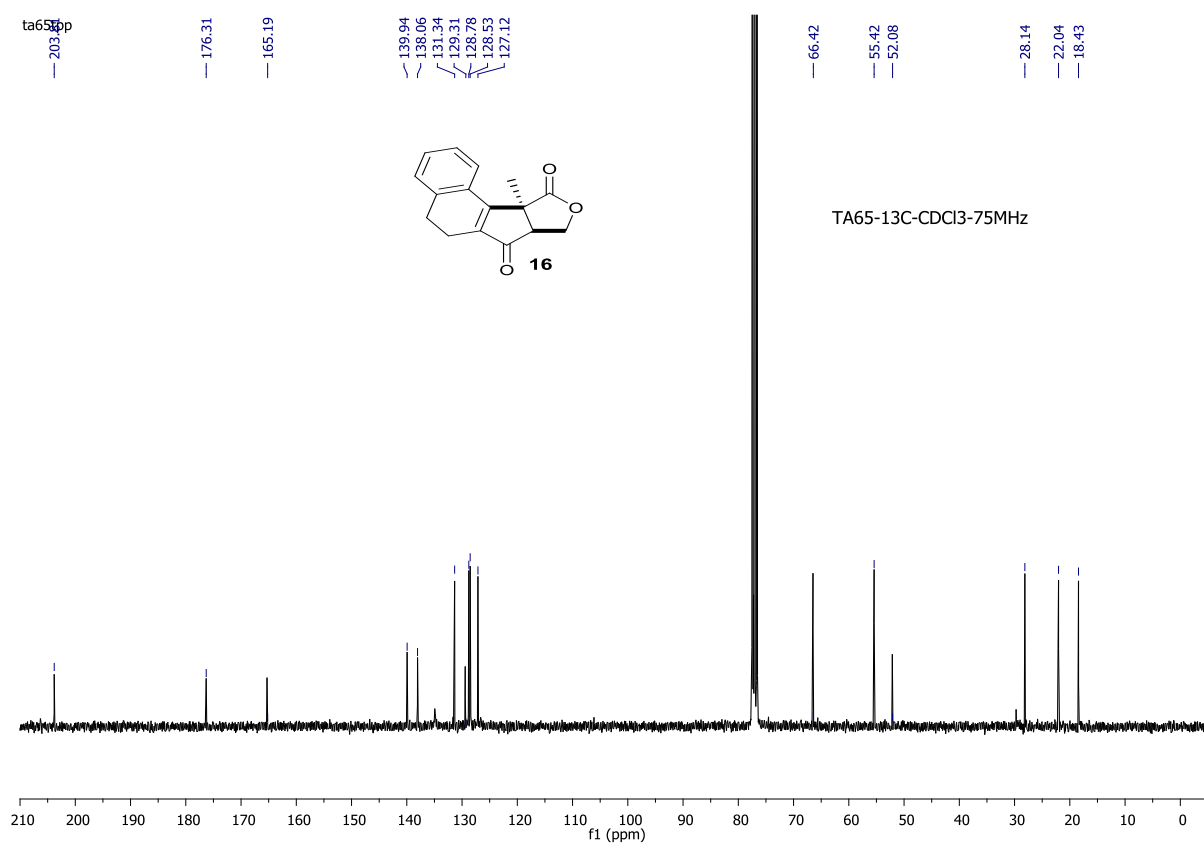

## 10. Noesy experiments: compound 4

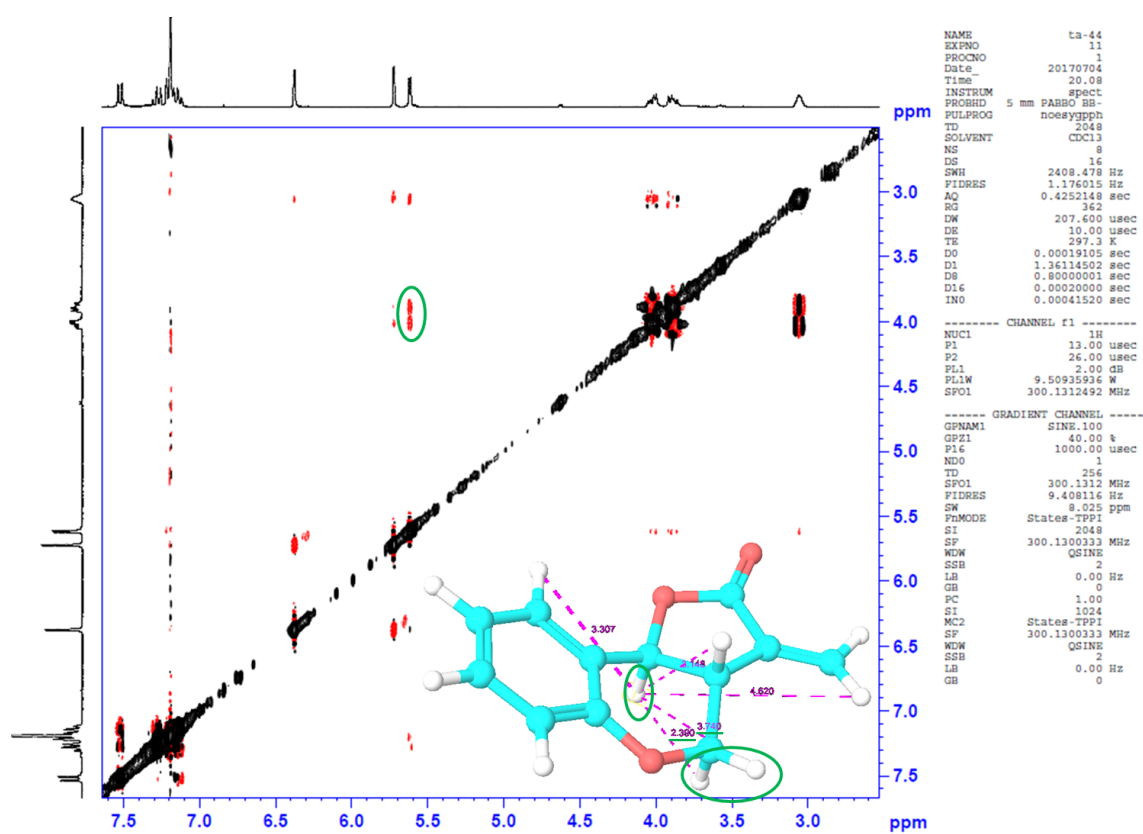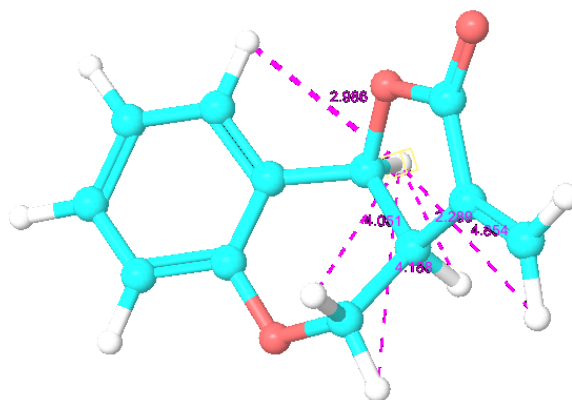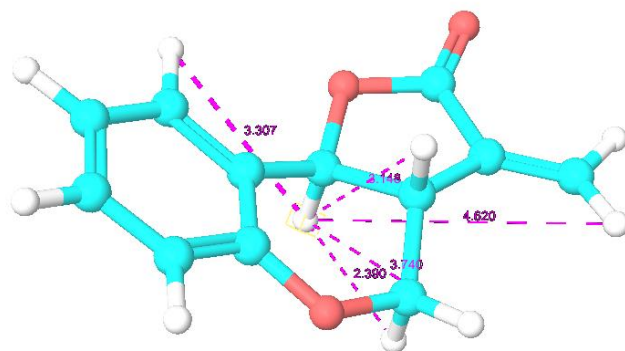



## 11. Control experiment : olefin migration

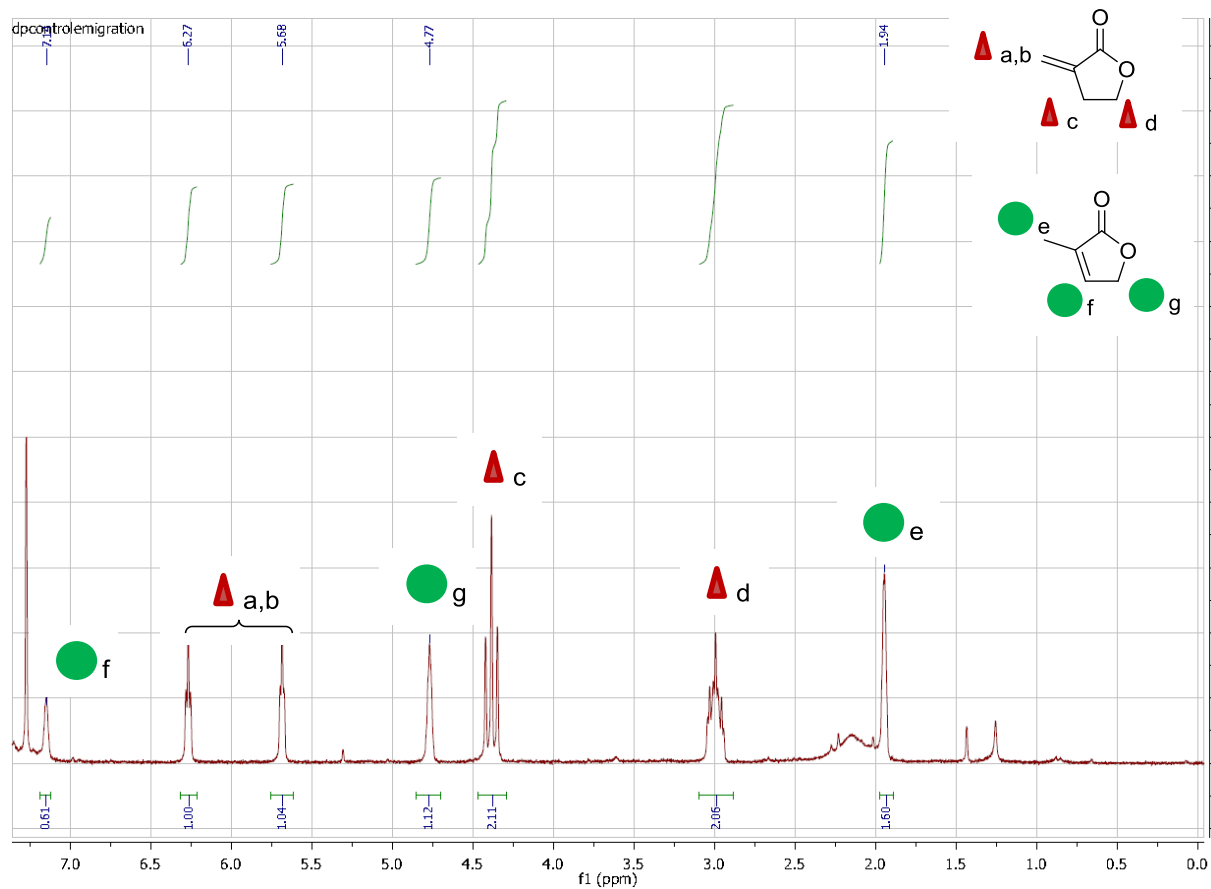

Chemical shifts in agreement with Jefford, C.W.; Rossier, J.-C.; Boukouvalas, J.; Sledeski, A.W.; Huang, P.-Z. A concise synthesis of siphonodictidine. *J. Nat. Prod.* **2004**, *67*, 1383–1386. DOI: 10.1021/np0400860.

## 12. X-ray crystal structure for lactone 12 and 16

### Structure of 12 CCDC 1565162

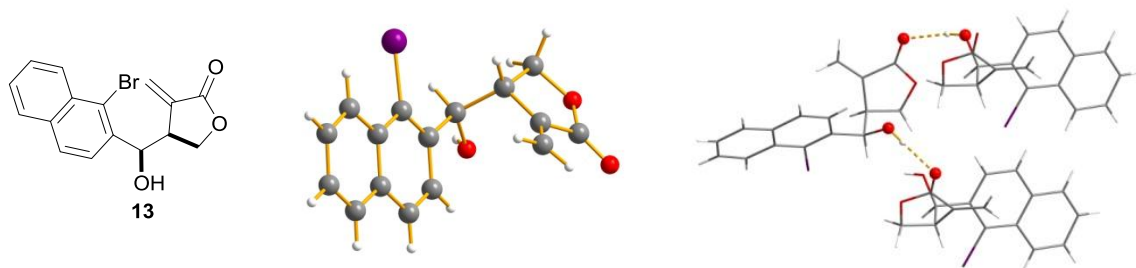

### Structure of 16 CCDC 1565163

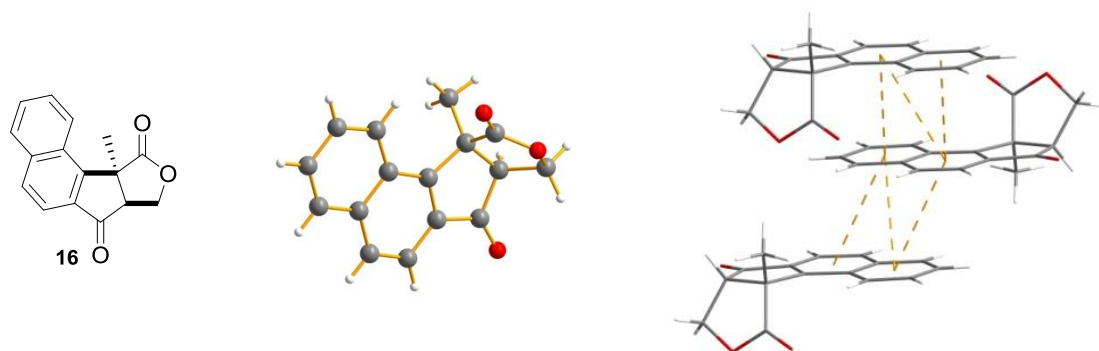

Supplement: s1 [file s1]
